# Supplementary material for: Plant Biodiversity Drivers in Brazilian Campos Rupestres: Insights from Phylogenetic Structure
Source: PubMed Central journal article supplement (PMC5742226; doi:10.3389/fpls.2017.02141), 2017-12-19
Supplement: Table_1.pdf [file Table_1.pdf]

## *Supplementary Material*

### **Plant biodiversity drivers in Brazilian *campos rupestres*: insights from phylogenetic structure.**

**Daniela C. Zappi\***, Marcelo Freire Moro, Thomas R. Meagher, Eimear Nic Lughadha

\* **Correspondence:** Daniela C. Zappi: [daniela.zappi@itv.org](mailto:daniela.zappi@itv.org)

#### **1 Supplementary Data**

The following Supplementary Data files are available through the Figshare repository under <https://doi.org/10.6084/m9.figshare.5480536.v1>

Supplementary Data 1.1- Matrix species-sites initial dataset with 66 sites

Supplementary Data 1.2- Matrix species-sites with selected 47 sites

Supplementary Data 1.3- taxa

Supplementary Data 2.1- agesexp by Gastauer & Meira-Neto 2016

Supplementary Data 2.2- megatree R20120839mod – Gastauer & Meira-Neto 2016.new

Supplementary Data 3- espinhaco.tree-dated

Supplementary Data 4.1- nodesigl-results

Supplementary Data 4.2- nodesigresults

Supplementary Data 5- table.phylodist-47sites

## 2 Supplementary Figures and Tables

Supplementary Table 1. Tests for normality and homogeneity of variance for NRI and NTI.

|     | Shapiro Wilk test for normality |         | Levene's test for homogeneity of variance |         |         |
|-----|---------------------------------|---------|-------------------------------------------|---------|---------|
|     | W                               | p-value | Df                                        | F value | Pr(> F) |
| NRI | 0.97026                         | 0.2711  | 3, 43                                     | 1.6264  | 0.1973  |
| NTI | 0.95913                         | 0.09941 | 3, 43                                     | 3.0233  | 0.03979 |

Supplementary Table 2 Nodes in the phylogeny with significantly more/less daughter taxa in at least half of the sites of that habitat type compared with a random draw of taxa from the supertree (Phylocom procedure nodesig; Webb et al. 2008). [Over-represented clades included in Table 4 in the main paper are shaded. Clades without accepted names are listed in parentheses.] Where the significant node occurs below the family level, the family name follows it, for reference. Where the significant node occurs above the family level the clade name appears. Sig. more/less: significantly more or less daughter taxa in the given age category.

| Habitat type           | Sig. more/less | Node id | Family/genus              | Clade                                                                                                                        | Crown ages extracted from the exponential model (Gastauer & Meira-Neto 2016) used to build the Espinhaco megatree (Mya) |
|------------------------|----------------|---------|---------------------------|------------------------------------------------------------------------------------------------------------------------------|-------------------------------------------------------------------------------------------------------------------------|
| <i>Forest on canga</i> | More           | 346     | Solanaceae                |                                                                                                                              | 37                                                                                                                      |
|                        | More           | 347     |                           | Solanaceae <i>pro parte</i> incl. <i>Solanum</i> , <i>Nicotiana</i> , <i>Brunfelsia</i> , <i>Cestrum</i> , <i>Schwenckia</i> | < 37                                                                                                                    |
|                        | More           | 1440    |                           | 'meliaceae_to_rutaceae' + Sapindaceae                                                                                        | 66.4                                                                                                                    |
|                        | More           | 1814    |                           | Myrtaceae + Vochysiaceae                                                                                                     | 59.7                                                                                                                    |
|                        | More           | 1815    | Myrtaceae                 |                                                                                                                              | 52.2                                                                                                                    |
|                        | More           | 1896    | <i>Myrcia</i> (Myrtaceae) |                                                                                                                              | 26.1                                                                                                                    |
|                        | More           | 3433    |                           | commelinales+ ( <i>costus+hedychium</i> )                                                                                    | 83                                                                                                                      |

|                            |      |      |  |                                                                                                       |       |
|----------------------------|------|------|--|-------------------------------------------------------------------------------------------------------|-------|
| <i>Forest on canga</i>     | Less | 3011 |  | ((cyperaceae_to_juncaceae + mayaca) + (eriocaulaceae + xyridaceae)) + poaceae) + <i>cephalostemon</i> | 79    |
|                            | Less | 3012 |  | ((cyperaceae_to_juncaceae + mayaca) + (eriocaulaceae + xyridaceae))+poaceae                           | 73    |
|                            | Less | 3013 |  | (cyperaceae_to_juncaceae + mayaca) + (eriocaulaceae + xyridaceae)<br>i.e. cyperid clade + xyrid clade | 67    |
| <i>Forest on quartzite</i> | More | 3    |  | Eudicots                                                                                              | 128,9 |
|                            | More | 4    |  | Sabiales_to_Asterales                                                                                 | 126   |
|                            | More | 5    |  | Pentapetalids                                                                                         | 116,9 |
| <i>Forest on quartzite</i> | Less | 2715 |  | Narthecidae                                                                                           | 118   |
|                            | Less | 2736 |  | narthecidae minus alismatales                                                                         | 112.5 |
|                            | Less | 2737 |  | Missing clade name                                                                                    |       |
|                            | Less | 2750 |  | ?Asparagales + Commelinids?                                                                           | 101.5 |
|                            | Less | 3011 |  | ((cyperaceae_to_juncaceae + mayaca) + (eriocaulaceae + xyridaceae))+poaceae)+cephalostemon            | 79    |
|                            | Less | 3012 |  | ((cyperaceae_to_juncaceae + mayaca) + (eriocaulaceae + xyridaceae))+poaceae                           | 73    |
|                            | Less | 3013 |  | (cyperaceae_to_juncaceae + mayaca) +                                                                  | 67    |

## Supplementary Material

|                                     |      |      |                                |                                                                  |       |
|-------------------------------------|------|------|--------------------------------|------------------------------------------------------------------|-------|
|                                     |      |      |                                | (ericaulaceae + xyridaceae)                                      |       |
|                                     | Less | 3133 |                                | ericaulaceae + xyridaceae = xyrid clade                          | 50.25 |
| <i>Open vegetation on canga</i>     | More | 985  | <i>Eremanthus</i> (Asteraceae) |                                                                  | 20    |
| <i>Open vegetation on canga</i>     | Less | 3133 |                                | ericaulaceae + xyridaceae = xyrid clade                          | 50.25 |
| <i>Open vegetation on quartzite</i> | More | 2931 |                                | Commelinids                                                      | 96    |
|                                     | More | 3013 |                                | (cyperaceae_to_juncaceae + mayaca) + (ericaulaceae + xyridaceae) | 67    |
| <i>Open vegetation on quartzite</i> | Less | 1415 |                                | Subrosids                                                        | 116.8 |
|                                     | Less | 1416 |                                | Rosids                                                           | 108   |
|                                     | Less | 1417 |                                | ?Eurosids?                                                       |       |
